# Supplementary material for: Hematological abnormalities in Jacobsen syndrome: cytopenia of varying severities and morphological abnormalities in peripheral blood and bone marrow
Source: PubMed Central journal article supplement — Haematologica. 2023 Jun 15;108(12):3438–43. doi: 10.3324/haematol.2022.282513 (PMC10690895; doi:10.3324/haematol.2022.282513), 2023-06-15
Supplement: 2023_282513_YAMASHITA_SUPPL.pdf [file 2023_282513_YAMASHITA_SUPPL.pdf]

# Hematological abnormalities in Jacobsen syndrome: cytopenia of varying severities and morphological abnormalities in peripheral blood and bone marrow

Daiki Yamashita,<sup>1</sup> Hideki Muramatsu,<sup>1</sup> Atsushi Narita,<sup>1</sup> Manabu Wakamatsu,<sup>1</sup> Yusuke Tsumura,<sup>1</sup> Daichi Sajiki,<sup>1</sup> Ryo Maemura,<sup>1</sup> Ayako Yamamori,<sup>1</sup> Masayuki Imaaya,<sup>1</sup> Kotaro Narita,<sup>1</sup> Shinsuke Kataoka,<sup>1</sup> Rieko Taniguchi,<sup>1</sup> Nobuhiro Nishio,<sup>1</sup> Yusuke Okuno,<sup>2</sup> Naoto Fujita,<sup>3</sup> Katsuyoshi Koh,<sup>4</sup> Katsutsugu Umeda,<sup>5</sup> Eiji Morihana,<sup>6</sup> Hideto Iwafuchi,<sup>7</sup> Masafumi Ito,<sup>8</sup> Seiji Kojima,<sup>1</sup> Asahito Hama<sup>9</sup> and Yoshiyuki Takahashi<sup>1</sup>

<sup>1</sup>Department of Pediatrics, Nagoya University Graduate School of Medicine, Nagoya; <sup>2</sup>Department of Virology, Nagoya City University Graduate School of Medical Sciences, Nagoya; <sup>3</sup>Department of Pediatrics, Hiroshima Red Cross Hospital & Atomic-Bomb Survivors Hospital, Hiroshima; <sup>4</sup>Department of Hematology/Oncology, Saitama Children's Medical Center, Saitama; <sup>5</sup>Department of Pediatrics, Graduate School of Medicine, Kyoto University, Kyoto; <sup>6</sup>Department of Pediatric Cardiology, Aichi Children's Health and Medical Center, Obu; <sup>7</sup>Department of Pathology, Shizuoka Children's Hospital, Shizuoka; <sup>8</sup>Department of Pathology, Japanese Red Cross Aichi Medical Center Nagoya First Hospital, Nagoya and <sup>9</sup>Department of Hematology and Oncology, Children's Medical Center, Japanese Red Cross Aichi Medical Center Nagoya First Hospital, Nagoya, Japan

Correspondence:

H. MURAMATSU - [hideki-muramatsu@med.nagoya-u.ac.jp](mailto:hideki-muramatsu@med.nagoya-u.ac.jp)

Y. TAKAHASHI - [ytakaha@med.nagoya-u.ac.jp](mailto:ytakaha@med.nagoya-u.ac.jp)

<https://doi.org/10.3324/haematol.2022.282513>

**Table S1. Hematological findings and other complications of 4 patients in our cohort.**

|                                            | Case 1                  | Case 2                  | Case 3                  | Case 4                  |
|--------------------------------------------|-------------------------|-------------------------|-------------------------|-------------------------|
| <b>Range of 11q deletion (hg19)</b>        | 124252297<br>-134257553 | 123396856<br>-134121202 | 122526757<br>-134257553 | 119440000<br>-134939999 |
| <b>Hematological findings</b>              |                         |                         |                         |                         |
| <i>Age at onset of cytopenia, months</i>   | 121                     | 191                     | 0                       | 0                       |
| <i>Bone marrow cellularity</i>             | Normocellular           | Normocellular           | Hypocellular            | ND                      |
| <i>Cytopenia</i>                           | Yes                     | Yes                     | Yes                     | Yes                     |
| Neutropenia                                | No                      | No                      | Yes                     | No                      |
| Anemia                                     | Yes                     | Yes                     | Yes                     | No                      |
| Thrombocytopenia                           | Yes                     | Yes                     | Yes                     | Yes                     |
| <b>Non-hematological findings</b>          |                         |                         |                         |                         |
| <i>Congenital heart disease</i>            | Yes                     | Yes                     | Yes                     | Yes                     |
| HLHS                                       | No                      | No                      | No                      | Yes                     |
| VSD                                        | Yes                     | Yes                     | Yes                     | Yes                     |
| Shone's complex                            | No                      | No                      | No                      | No                      |
| ASD                                        | No                      | No                      | No                      | No                      |
| Others                                     | Yes                     | Yes                     | Yes                     | Yes                     |
| <i>Skeletal abnormality</i>                | Yes                     | Yes                     | No                      | Yes                     |
| Craniofacial abnormalities                 | Yes                     | Yes                     | No                      | Yes                     |
| Vertebral body anomalies                   | No                      | No                      | No                      | No                      |
| Scoliosis                                  | No                      | No                      | No                      | No                      |
| Hip dislocation                            | No                      | No                      | No                      | No                      |
| <i>Gastrointestinal tract malformation</i> | No                      | No                      | No                      | No                      |
| Pyloric stenosis                           | No                      | No                      | No                      | No                      |
| Gut malrotation                            | No                      | No                      | No                      | No                      |
| Annular pancreas                           | No                      | No                      | No                      | No                      |
| Anal abnormality                           | No                      | No                      | No                      | No                      |
| Duodenal atresia                           | No                      | No                      | No                      | No                      |
| Inguinal hernia                            | No                      | No                      | No                      | No                      |
| <i>Urinary system malformation</i>         | No                      | No                      | No                      | Yes                     |
| Unilateral kidney dysplasia                | No                      | No                      | No                      | No                      |
| Horseshoe kidney                           | No                      | No                      | No                      | Yes                     |
| Multicystic kidneys                        | No                      | No                      | No                      | No                      |
| Hydronephrosis                             | No                      | No                      | No                      | No                      |
| Double urethers                            | No                      | No                      | No                      | No                      |
| Cryptorchidism                             | No                      | No                      | No                      | No                      |
| <i>Mental retardation</i>                  | Yes                     | Yes                     | No                      | Yes                     |
| <i>Structural abnormality of the brain</i> | No                      | No                      | No                      | No                      |
| Enlarged ventricles                        | No                      | No                      | No                      | No                      |
| Agenesis of corpus callosum                | No                      | No                      | No                      | No                      |
| Spina bifida                               | No                      | No                      | No                      | No                      |

|                                    |    |    |     |     |
|------------------------------------|----|----|-----|-----|
| Sensorineural deafness             | No | No | No  | No  |
| <i>Immunodeficiency</i>            | No | No | No  | Yes |
| CD4+ T lymphocytopenia             | No | No | No  | Yes |
| <b>Treatment</b>                   |    |    |     |     |
| <i>Blood transfusion</i>           | No | No | Yes | Yes |
| <i>Bone marrow transplantation</i> | No | No | No  | No  |

---

HLHS; hypoplastic left heart syndrome, VSD; ventricular septal defect, ASD; atrial septal defect, ND; not determined

**Table S2. Supplemental References**

| No. | Reference                                                                                                                                                                                                                                           |
|-----|-----------------------------------------------------------------------------------------------------------------------------------------------------------------------------------------------------------------------------------------------------|
| S1  | Fujita H, Yanagi T, Kosaki R, et al. Transverse limb defect in a patient with Jacobsen syndrome: concurrence of malformation and disruption. <i>Am J Med Genet A</i> . 2010 Apr;152A(4):1033-1035.                                                  |
| S2  | Malia LA, Wolkoff LI, Mnayer L, Tucker JW, Parikh NS. A case report: Jacobsen syndrome complicated by Paris-Trousseau syndrome and Shone's complex. <i>J Pediatr Hematol Oncol</i> . 2015 Oct;37(7):e429-e432.                                      |
| S3  | Lo JO, Feist CD, Hashima J, Shaffer BL. Jacobsen syndrome detected by noninvasive prenatal testing. <i>Obstet Gynecol</i> . 2015 Feb;125(2):387-389.                                                                                                |
| S4  | Jurcă AD, Kozma K, Ioana M, et al. Morphological and genetic abnormalities in a Jacobsen syndrome. <i>Rom J Morphol Embryol</i> . 2017;58(4):1531-1534.                                                                                             |
| S5  | Zahn S, Ehrbrecht A, Bosse K, et al. Further delineation of the phenotype maps for partial trisomy 16q24 and Jacobsen syndrome by a subtle familial translocation t(11;16)(q24.2;q24.1). <i>Am J Med Genet A</i> . 2005 Nov 15;139(1):19-24.        |
| S6  | Trkova M, Becvarova V, Hynek M, et al. SNP array and phenotype correlation shows that FLI1 deletion per se is not responsible for thrombocytopenia development in Jacobsen syndrome. <i>Am J Med Genet A</i> . 2012 Oct;158A(10):2545-2550.         |
| S7  | Breton-Gorius J, Favier R, Guichard J, et al. A new congenital dysmegakaryopoietic thrombocytopenia (Paris-Trousseau) associated with giant platelet alpha-granules and chromosome 11 deletion at 11q23. <i>Blood</i> . 1995 Apr 1;85(7):1805-1814. |
| S8  | Krishnamurti L, Neglia JP, Nagarajan R, et al. Paris-Trousseau syndrome platelets in a child with Jacobsen's syndrome. <i>Am J Hematol</i> . 2001 Apr;66(4):295-299.                                                                                |
| S9  | Johnson JP, Haag M, Beischel L, et al. 'Deletion rescue' by mitotic 11q uniparental disomy in a family with recurrence of 11q deletion Jacobsen syndrome. <i>Clin Genet</i> . 2014 Apr;85(4):376-380.                                               |
| S10 | Penny LA, Dell'Aquila M, Jones MC, et al. Clinical and molecular characterization of patients with distal 11q deletions. <i>Am J Hum Genet</i> . 1995 Mar;56(3):676-683.                                                                            |
| S11 | Lin JH, Hou JW, Teng RJ, Tien HF, Lin KH. Jacobsen distal 11q deletion syndrome with a myelodysplastic change of hemopoietic cells. <i>Am J Med Genet</i> . 1998 Feb 3;75(4):341-344.                                                               |
| S12 | Van Zutven LJ, van Bever Y, Van Nieuwland CC, et al. Interstitial 11q deletion derived from a maternal ins(4;11)(p14;q24.2q25): a patient report and review. <i>Am J Med Genet A</i> . 2009 Jul;149A(7):1468-1475.                                  |
| S13 | Schinzel A, Auf der Maur P, Moser H. Partial deletion of long arm of chromosome 11[del(11)(q23)]: Jacobsen syndrome. Two new cases and review of the clinical findings. <i>J Med Genet</i> . 1977 Dec;14(6):438-444.                                |
| S14 | Voullaire LE, Webb GC, Leversha MA. Chromosome deletion at 11q23 in an abnormal child from a family with inherited fragility at 11q23. <i>Hum Genet</i> . 1987 Jun;76(2):202-204.                                                                   |
| S15 | Clang DR, LaBaere RJ, II. Jacobsen syndrome: chromosome deletion at 11q23. <i>J Am Osteopath Assoc</i> . 1998 Oct;98(10):551-554.                                                                                                                   |
| S16 | Michaelis RC, Velagaleti GV, Jones C, et al. Most Jacobsen syndrome deletion breakpoints occur distal to FRA11B. <i>Am J Med Genet</i> . 1998 Mar 19;76(3):222-228.                                                                                 |
| S17 | Chen CP, Lin SP, Hsu CH, et al. Pure distal 11q deletion without additional genomic imbalances in a female infant with Jacobsen syndrome and a de novo unbalanced reciprocal translocation. <i>Genet Couns</i> . 2012;23(2):223-229.                |

Identification of studies via databases and registers

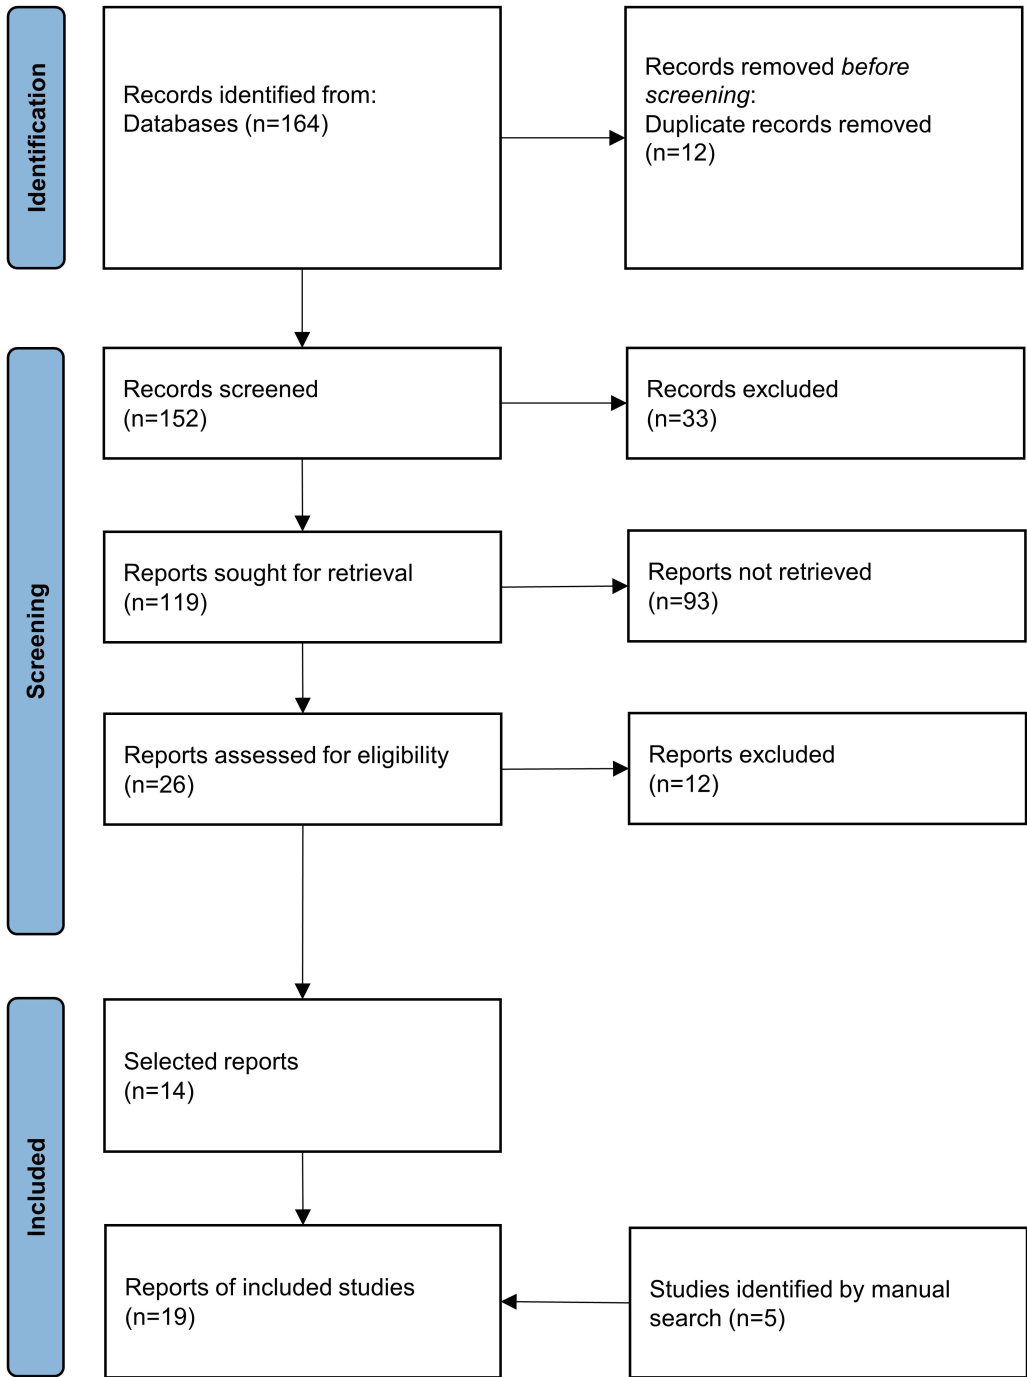

**Figure S1. Flow diagram of literature review**

A flow diagram was created by performing a search using the following formula:

“Jacobsen syndrome”[MH] AND (“pancytopenia”[TIAB] OR “anemia”[TIAB] OR  
“neutropenia”[TIAB] OR “thrombocytopenia”[TIAB]) AND (“Cohort Studies”[MH] OR  
“Case Reports”[PT]) AND Humans[MH] AND (English[LA]) AND (“0000”[PDAT]:  
“2022/08/31”[PDAT])
